# Supplementary material for: Eine Längsschnittstudie zur Vorhersage von ADHS-Symptomen und Schulleistungen in der 1. Klasse durch exekutive Funktionen im Vorschulalter
Source: Atypon-hosted journal article supplement (doi:10.1026/0942-5403/a000383), 2022-07-01
Supplement: 0942-5403_a000383_esm1.pdf [file 0942-5403_a000383_esm1.pdf]

## **ESM 1.** Ausführliche Beschreibung der Instrumente.

### **EF: Inhibition**

**Go/NoGo.** Diese selbst entwickelte Go/NoGo-Aufgabe (Gawrilow & Gollwitzer, 2008) enthält Bilder von Tieren (Huhn, Katze, Maus, Kuh und Schwein) und Transportmitteln (Flugzeug, Auto, LKW, Schiff und Zug). Die Kinder müssen die dargebotenen Stimuli entweder als Tiere oder als Transportmittel klassifizieren, indem sie mit den Zeigefingern der linken bzw. rechten Hand eine von zwei markierten Tasten auf der Tastatur drücken. Jedem Stimulus geht ein 750 ms langes Fixationskreuz voraus, das in der Mitte des Bildschirms angezeigt wird. In der Mitte des Bildschirms wird dann für 1.500 ms entweder ein Tier oder ein Verkehrsmittel dargestellt. Danach erscheint für 2.250 ms ein leerer Bildschirm. In einem Drittel der Fälle werden 150 ms vor dem Erscheinen des Stimulus auditive Stoppsignale präsentiert.

Die Aufgabe umfasst in der Studie 30 Versuche mit einer NoGo-Rate von einem Drittel. Die aus dieser Aufgabe abgeleitete Punktzahl war die Anzahl der Verwechslungsfehler (comission-error; drücken der Taste, wenn ein NoGo-Reiz präsentiert wurde). Da jedoch bei allen anderen Exekutivmaßnahmen niedrige Werte auf eine schlechte Leistung hindeuteten, wurde dieses Maß umgekehrt, indem die Gesamtzahl der NoGo-Reize (d. h. 10) genommen und die Anzahl der Inhibitionsfehler abgezogen wurde. Daraus ergab sich eine Punktzahl zwischen 0 (d. h. das Kind hat seine Reaktion bei keinem der NoGo-Versuche gehemmt) und 10 (d. h. das Kind hat seine Reaktion bei allen NoGo-Versuchen gehemmt).

**Tag/Nacht-Stroop-ähnliche Aufgabe.** Es wurde eine modifizierte Version der Stroop-Aufgabe verwendet. Beim ursprünglichen Stroop-Test entsteht ein Reaktionskonflikt, wenn eine übermäßig erlernte Reaktion (z. B. das Lesen des Wortes Blau) unterdrückt und

stattdessen die Farbe des geschriebenen Wortes (z. B. Rot) genannt werden muss. Da Kinder im Kindergartenalter noch nicht lesen können, wurde der ursprüngliche Stroop-Test durch eine Stroop-ähnliche Aufgabe mit Bildern ersetzt. Diese Aufgabe wurde ursprünglich von Gerstadt, Hong und Diamond (1994) entwickelt und verwendet ein Bildpaar (z. B. ein Bild von einer Sonne und einem Mond). Das Kind wird aufgefordert, das Gegenteil zu sagen, wenn ein Bild präsentiert wird (z. B. "Tag" zu sagen, wenn ein Bild von einem Mond präsentiert wird und umgekehrt). Aufgrund festgestellter Deckeneffekte wurde das Aufgabenparadigma von Berlin und Bohlin (2002) dahingehend modifiziert, dass den Kindern vier verschiedene Bildpaare (d.h. Sonne/Mond, Junge/Mädchen, großes/kleines Geschenk, Pfeil nach oben/unten) auf einem Computerbildschirm in einem festen Stimulusintervall präsentiert werden. Außerdem ist die Aufgabe nun in zwei Teile geteilt, die Anweisungen ändern sich zwischen den beiden Teilen nicht. (a) Teil 1: Dem Kind wird jedes Bild dreimal in zufälliger Reihenfolge präsentiert, wobei die Paare nicht gemischt werden (d. h. die ersten sechs Bilder sind entweder ein Bild eines Jungen oder eines Mädchens, die nächsten sechs Bilder sind entweder ein Bild einer Sonne oder eines Mondes usw.). (b) Teil 2: Jedes Bild wird dreimal präsentiert, aber die acht Bilder werden nach dem Zufallsprinzip präsentiert. Jeder Stimulus wird für 1.500 ms präsentiert (1.000 ms für Teil 2), gefolgt von einem Reaktionszeitfenster von 1.500 ms und einer Wartezeit von 1.500 ms, bevor der nächste Stimulus auf dem Computerbildschirm erscheint. Die Anzahl der richtigen Antworten bei dieser Aufgabe wurde in der vorliegenden Studie als Maß für die hemmende Kontrolle verwendet. Die höchstmögliche Punktzahl war 48.

**Head-Toes-Knees-Shoulders (HTKS).** Das HTKS umfasst vier gepaarte Regeln: "Berühre deinen Kopf!" und "Berühre deine Zehen!", "Berühre deine Schultern!" und "Berühre deine Knie!". Die Kinder reagieren zunächst auf natürliche Weise und werden dann angewiesen, das Verhalten zu wechseln, indem sie auf die entgegengesetzte Weise reagieren (z. B. den

Kopf berühren, wenn sie aufgefordert wurden, die Zehen zu berühren). Die Aufgabe besteht aus zwei Teilen mit jeweils 10 Items. Für eine richtige Antwort erhält das Kind 2 Punkte, für eine falsche Antwort, die vom Kind korrigiert wird, 1 Punkt und für eine falsche Antwort keinen Punkt. Daher kann die Gesamtpunktzahl zwischen 0 und 40 liegen (McClelland et al., 2007, 2014; von Suchodoletz et al., 2014).

**Statue-Test.** Der Statue-Subtest aus der englischsprachigen NEPSY-Batterie (Korkman, Kirk & Kemp, 2007) wurde zur Beurteilung der motorischen Hemmung eingesetzt. Das Kind wird gebeten, sich wie eine Statue hinzustellen, mit einem Arm in die Höhe gestreckt, und während eines Zeitraums von 75 Sekunden still (d. h. ohne den Körper zu bewegen) und mit geschlossenen Augen zu verharren. In dieser Zeit versucht der Untersucher, das Kind zu Reaktionen zu veranlassen, indem er Geräusche erzeugt (z. B. einen Bleistift auf den Tisch fallen lässt oder auf den Tisch klopft). Die Bewegungen und Äußerungen des Kindes als Reaktion auf diese Ablenkungen sowie die spontanen Reaktionen werden in 5-Sekunden-Intervallen bewertet (keine Bewegung/Reaktion = 2 Punkte, wenig Bewegung/eine Reaktion = 1 Punkt, übermäßige Bewegung/mehr als eine Reaktion = 0 Punkte). Die maximale Punktzahl beträgt 30 Punkte.

## **EF: Flexibilität**

**Dimensional Change Card Sort (DCCS).** Der Test wurde eingesetzt, um die Flexibilität zu messen. Das Kind wird aufgefordert, verschiedene Objekte entweder nach Farbe oder Form zu sortieren. Aufgrund eines erwarteten Deckeneffekts (Garon, Bryson & Smith, 2008) wurde eine computergestützte Version aus der NIH Toolbox verwendet (Zelazo et al., 2013).. Die Punktzahl wird berechnet, indem die Anzahl der richtigen Versuche von 50 gezählt wird; daher reicht die mögliche Punktzahl von 0-50.

## **Schulische Vorläuferfertigkeiten**

**Sprachliche Vorläuferfertigkeiten.** Es wurden drei Aufgaben in Anlehnung an Krajewski und Schneider (Krajewski & Schneider, 2009a) verwendet. Bei der Phonem-Synthese-Aufgabe hörten die Kinder eine Sequenz von einzelnen Phonemen und mussten diese dem entsprechenden Wort zuordnen und das dazugehörige Bild aus einer Auswahl von vier Bildern auswählen (8 Sequenzen, maximale Punktzahl = 8). Zur Beurteilung der Reimfähigkeit wurde eine leicht modifizierte Aufgabe zur Lautkategorisierung verwendet. Hier hörten die Kinder eine Folge von vier Wörtern, die von einer Computerstimme vorgelesen wurden, und mussten dann angeben, welches der Wörter sich nicht auf die anderen reimte. Die Vier-Wort-Sequenz wurde dreimal hintereinander präsentiert, um die Anforderungen an das phonologische Arbeitsgedächtnis bei dieser Aufgabe zu minimieren (10 Sequenzen, maximale Punktzahl = 10). In der dritten Aufgabe mussten die Kinder 10 vom Computer vorgelesene Sätze anhören und diese Sätze wiederholen (maximale Punktzahl = 10). Die maximale Punktzahl für die spezifischen Vorläufer des Lesens und Rechtschreibens betrug 28.

**Mathematische Vorläuferfähigkeiten.** Es wurden fünf Aufgaben verwendet, wie sie von Krajewski und Schneider (Krajewski & Schneider, 2009b) beschrieben wurden, um spezifische mathematische Vorläuferfähigkeiten (d. h. Quantitäts-Zahlenkompetenzen) zu beurteilen. Bei der Aufgabe zur Zahlenwortfolge wurden die Kinder gebeten, bis zur höchsten ihnen bekannten Zahl zu zählen und wurden gestoppt, wenn sie in der Lage waren, in der richtigen Reihenfolge bis 31 zu zählen (sie erhielten die Punktzahl 1 für das korrekte Zählen bis 10, die Punktzahl 2 für das korrekte Zählen bis 20, die Punktzahl 3 für das korrekte Zählen bis 30 und die Punktzahl 4 für das korrekte Zählen bis oder über 31). Außerdem wurden sie gebeten, von 5 an rückwärts zu zählen (wobei sie für richtiges Zählen einen Punkt erhielten). Die Kinder sollten die Zahl nach der vorgegebenen Zahl (die Zahlen

waren 5, 9 und 18, maximale Punktzahl = 3) und die Zahl vor der vorgegebenen Zahl (die Zahlen waren 3, 8 und 12, maximale Punktzahl = 3) nennen. Bei der Aufgabe zu den Ziffern mussten die Kinder die Ziffern von 1 bis 20 benennen, die ihnen auf Karten in zufälliger Reihenfolge vorgelegt wurden. Für die richtige Benennung jeder Ziffer erhielten sie einen halben Punkt (Höchstpunktzahl = 10). Bei der Aufgabe zum Mengenkonzept wurden den Kindern Karten mit verschiedenen Karten mit unterschiedlich vielen Kindern darauf vorgelegt und sie sollten diese den Ziffern zuordnen (Höchstpunktzahl = 3) oder die Karte mit der richtigen Anzahl von Kindern finden (Höchstpunktzahl = 2). Bei der Aufgabe zur Zuordnung von Menge und Zahl (Höchstpunktzahl = 7) sahen die Kinder mehrere Marienkäfer auf einem Blatt, die in einer Reihe angeordnet waren, wobei ein Marienkäfer fehlte. Jeder Marienkäfer hatte eine andere Anzahl von Punkten auf seinem Rücken. Die Anzahl der Punkte bestimmte die Position in der Reihe (d. h. der erste Käfer hatte einen Fleck, der zweite Käfer hatte zwei Flecken usw.). In drei verschiedenen Durchgängen wurde den Kindern eine unvollständige Reihe vorgelegt, in der einer der Käfer fehlte. Die Aufgabe der Kinder bestand darin, den fehlenden Käfer aus einer Auswahl von fünf Käfern auszuwählen und ihn korrekt in die Reihe einzufügen. Nach dem Einsetzen des Käfers musste jedes Kind außerdem angeben, welcher der Käfer das gleiche Alter wie das Kind hatte, welche Käfer jünger und welche älter waren, wobei es davon ausging, dass die Anzahl der Punkte auf dem Rücken das Alter jedes Käfers angab. Bei der Aufgabe zum Vergleich von Zahlenwörtern (Höchstpunktzahl = 8) mussten die Kinder entscheiden, welches von zwei Zahlenwörtern mehr (5-3, 7-9, 15-17 und 20-10) oder weniger (4-6, 9-8, 11-12 und 19-18) darstellt. Die maximale Gesamtpunktzahl für die spezifischen mathematischen Vorläuferfähigkeiten lag bei 42.

## Literatur

- Berlin, L. & Bohlin, G. (2002). Reponse inhibition, hyperactivity, and conduct problems among preschool children. *Journal of Clinical Child Psychology*, 31 (2), 242–251.  
doi:10.1207/s15374424jccp3102\_09
- Garon, N., Bryson, S.E. & Smith, I.M. (2008). Executive function in preschoolers: A review using an integrative framework. *Psychological Bulletin*, 134 (1), 31–60.  
doi:10.1037/0033-2909.134.1.31
- Gawrilow, C. & Gollwitzer, P.M. (2008). Implementation intentions facilitate response inhibition in children with ADHD. *Cognitive Therapy and Research*, 32 (2), 261–280.  
doi:10.1007/s10608-007-9150-1
- Gerstadt, C.L., Hong, Y.J. & Diamond, A. (1994). The relationship between cognition and action: performance of children 3 1 2-7 years old on a stroop- like day-night test. *Cognition*, 53 (2), 129–153. doi:10.1016/0010-0277(94)90068-X
- Korkman, M., Kirk, U. & Kemp, S. (2007). *NEPSY: A developmental neuropsychological assessment (2nd. Edition)*. San Antonio, TX: Psychological Corporation.
- Krajewski, K. & Schneider, W. (2009a). Exploring the impact of phonological awareness, visual-spatial working memory, and preschool quantity-number competencies on mathematics achievement in elementary school: Findings from a 3-year longitudinal study. *Journal of Experimental Child Psychology*, 103 (4), 516–531. Elsevier Inc.  
doi:10.1016/j.jecp.2009.03.009
- Krajewski, K. & Schneider, W. (2009b). Early development of quantity to number-word linkage as a precursor of mathematical school achievement and mathematical difficulties : Findings from a four-year longitudinal study. *Learning and Instruction*, 19, 513–526. doi:10.1016/j.learninstruc.2008.10.002

- McClelland, M.M., Cameron, C.E., Connor, C.M., Farris, C.L., Jewkes, A.M. & Morrison, F.J. (2007). Links between behavioral regulation and preschoolers' literacy, vocabulary, and math skills. *Developmental Psychology*, 43 (4), 947–959. doi:10.1037/0012-1649.43.4.947
- McClelland, M.M., Cameron, C.E., Duncan, R., Bowles, R.P., Acock, A.C., Miao, A. et al. (2014). Predictors of early growth in academic achievement: The head-toes-knees-shoulders task. *Frontiers in Psychology*, 5 (June), 1–14. doi:10.3389/fpsyg.2014.00599
- von Suchodoletz, A., Gawrilow, C., Gunzenhauser, C., Merkt, J., Hasselhorn, M., Wanless, S.B. et al. (2014). Erfassung der Selbstregulation vor dem Schuleintritt. *Psychologie in Erziehung und Unterricht*, 61, 165–174. doi:10.2378/peu2014.art13d
- Zelazo, P.D., Anderson, J.E., Richler, J., Wallner-Allen, K., Beaumont, J.L. & Weintraub, S. (2013). NIH toolbox cognition battery (CB): Measuring executive function and attention. *Monographs of the Society for Research in Child Development*, 78 (4), 16–33. doi:10.1111/mono.12032
