# Supplementary material for: Eine Längsschnittstudie zur Vorhersage von ADHS-Symptomen und Schulleistungen in der 1. Klasse durch exekutive Funktionen im Vorschulalter
Source: Atypon-hosted journal article supplement (doi:10.1026/0942-5403/a000383), 2022-07-01
Supplement: 0942-5403_a000383_esm2.pdf [file 0942-5403_a000383_esm2.pdf]

**ESM 2.** Tabelle E1. Interkorrelationen von EF, ADHS-Symptome, Vorläuferfertigkeiten und Schulleistungen

|                                               | 2     | 3   | 4   | 5   | 6    | 7   | 8    | 9     | 10     | 11    | 12    | 13     | 14     | 15    | 16    | 17    | 18   |
|-----------------------------------------------|-------|-----|-----|-----|------|-----|------|-------|--------|-------|-------|--------|--------|-------|-------|-------|------|
| <b>Inhibition</b>                             |       |     |     |     |      |     |      |       |        |       |       |        |        |       |       |       |      |
| 1. HTKS <i>t1</i>                             | .42** | .16 | .23 | .14 | .13  | .17 | .02  | -.02  | -.21   | .28*  | .61** | -.07   | -.07   | .08   | .04   | .15   | .11  |
| 2. Stroop <i>t1</i>                           |       | .11 | .25 | .09 | -.12 | .19 | .23  | -.13  | -.29*  | .18   | .32*  | -.07   | -.21   | .14   | .09   | .19   | .14  |
| 3. Statue <i>t2</i>                           |       |     | .22 | .09 | .04  | .23 | .08  | .05   | -.03   | .28   | -.01  | -.05   | -.17   | -.01  | .01   | .02   | .06  |
| 4. Go/NoGo <i>t1</i>                          |       |     |     | .25 | .02  | .13 | .07  | -.36* | -.40** | .24   | .21   | -.55** | -.45** | .08   | -.03  | -.03  | -.18 |
| <b>Verschiebung</b>                           |       |     |     |     |      |     |      |       |        |       |       |        |        |       |       |       |      |
| 5. DCCS <i>t2</i>                             |       |     |     |     | .32  | .02 | .08  | -.30  | -.28   | -.06  | .15   | -.31*  | -.33*  | .09   | -.20  | -.22  | -.05 |
| <b>Arbeitsgedächtnis</b>                      |       |     |     |     |      |     |      |       |        |       |       |        |        |       |       |       |      |
| 6. Zahlenspanne<br>Vorwärts <i>t2</i>         |       |     |     |     |      | .06 | -.15 | -.14  | -.14   | .41** | .07   | -.07   | -.16   | .12   | .04   | .09   | .11  |
| 7. Zahlenspanne<br>rückwärts <i>t2</i>        |       |     |     |     |      |     | -.02 | -.27  | -.28   | .31*  | .41** | -.17   | -.22   | .36*  | .37*  | .30*  | .13  |
| 8. Corsi-Block <i>t2</i>                      |       |     |     |     |      |     |      | -.19  | -.28   | .04   | .13   | -.25   | -.19   | -.07  | .05   | .06   | .16  |
| <b>ADHS-Symptome</b>                          |       |     |     |     |      |     |      |       |        |       |       |        |        |       |       |       |      |
| 9. Unaufmerksamkeit<br><i>t1</i>              |       |     |     |     |      |     |      |       | .86**  | -.11  | -.19  | .44**  | .69**  | -.16  | -.03  | -.03  | .01  |
| 10. Hyperaktivität/Impul<br>sivität <i>t1</i> |       |     |     |     |      |     |      |       |        | -.30* | .45** | .76**  | -.10   | .03   | -.04  | -.07  | -.17 |
| <b>Vorläuferfertigkeiten</b>                  |       |     |     |     |      |     |      |       |        |       |       |        |        |       |       |       |      |
| 11. Sprache <i>t2</i>                         |       |     |     |     |      |     |      |       |        |       | .27*  | -.07   | -.23   | .38** | .40** | .37** | .11  |
| 12. Mathematik <i>t1</i>                      |       |     |     |     |      |     |      |       |        |       |       | -.28*  | -.19   | .36** | .27*  | .30*  | .24  |

|                                                | 2 | 3 | 4 | 5 | 6 | 7 | 8 | 9 | 10 | 11 | 12 | 13 | 14    | 15   | 16    | 17    | 18   |
|------------------------------------------------|---|---|---|---|---|---|---|---|----|----|----|----|-------|------|-------|-------|------|
| <b>ADHS-Symptome</b>                           |   |   |   |   |   |   |   |   |    |    |    |    |       |      |       |       |      |
| 13. Unaufmerksamkeit<br><i>t3</i>              |   |   |   |   |   |   |   |   |    |    |    |    | .66** | -.06 | -.10  | -.11  | .00  |
| 14. Hyperaktivität/Impulsi-<br>vität <i>t3</i> |   |   |   |   |   |   |   |   |    |    |    |    |       | -.10 | -.06  | .12   | -.08 |
| <b>Schulleistungen</b>                         |   |   |   |   |   |   |   |   |    |    |    |    |       |      |       |       |      |
| 15. Schreiben von <i>t3</i>                    |   |   |   |   |   |   |   |   |    |    |    |    |       |      | .66** | .68** | .21  |
| 16. Wörter lesen <i>t3</i>                     |   |   |   |   |   |   |   |   |    |    |    |    |       |      |       | .90** | .06  |
| 17. Lesen von Sätzen<br><i>t3</i>              |   |   |   |   |   |   |   |   |    |    |    |    |       |      |       |       | .17  |
| 18. Mathematik <i>t3</i>                       |   |   |   |   |   |   |   |   |    |    |    |    |       |      |       |       |      |

*Anmerkung.* \*  $p < .05$ ; \*\*  $p < .001$ . HTKS = Head-Toes-Knees-Shoulder-Aufgabe, Stroop = Tag-Nacht-Stroop-ähnliche Aufgabe, Statue = Statuetest aus NEPSY, DCCS = Dimensional Change Card Sort Test.
