# Supplementary material for: Eine Längsschnittstudie zur Vorhersage von ADHS-Symptomen und Schulleistungen in der 1. Klasse durch exekutive Funktionen im Vorschulalter
Source: Atypon-hosted journal article supplement (doi:10.1026/0942-5403/a000383), 2022-07-01
Supplement: 0942-5403_a000383_esm3.pdf [file 0942-5403_a000383_esm3.pdf]

**ESM 3.** Tabelle E2. Erklärung von ADHS-Symptomen im letzten Kindergartenjahr durch EF-Defizite zum selben Zeitpunkt.

|                                                         | <i>t1/t2</i> Unaufmerksamkeit |        |         |          |          |                      | <i>t1/t2</i> Hyperaktivität/Impulsivität |        |         |          |          |                      |
|---------------------------------------------------------|-------------------------------|--------|---------|----------|----------|----------------------|------------------------------------------|--------|---------|----------|----------|----------------------|
|                                                         | B                             | SE (B) | $\beta$ | <i>t</i> | <i>p</i> | $\Delta R^2$         | B                                        | SE (B) | $\beta$ | <i>t</i> | <i>p</i> | $\Delta R^2$         |
| <b>Modell 1</b>                                         |                               |        |         |          |          |                      |                                          |        |         |          |          |                      |
| <i>t1/t2</i> EF-Defizit                                 | 0.07                          | .03    | .351    | 2.68     | .010     | .12, <i>p</i> = .010 | 0.14                                     | .03    | .496    | 4.08     | <.001    | .25, <i>p</i> < .001 |
| <b>Modell 2</b>                                         |                               |        |         |          |          |                      |                                          |        |         |          |          |                      |
| Schritt 1                                               |                               |        |         |          |          |                      |                                          |        |         |          |          |                      |
| <i>t1/t2</i> Inhibitionsdefizit                         | 0.08                          | .22    | .220    | 1.59     | .117     | .05, <i>p</i> = .117 | 0.21                                     | .06    | .416    | 3.23     | .002     | .17, <i>p</i> = .002 |
| Schritt 2                                               |                               |        |         |          |          |                      |                                          |        |         |          |          |                      |
| <i>t1/t2</i> Arbeitsgedächtnis/<br>Flexibilitätsdefizit | 0.10                          | .31    | .307    | 2.19     | .033     | .13, <i>p</i> = .030 | 0.10                                     | .06    | .225    | 1.69     | .097     | .22, <i>p</i> = .002 |
| <b>Modell 3</b>                                         |                               |        |         |          |          |                      |                                          |        |         |          |          |                      |
| Schritt 1                                               |                               |        |         |          |          |                      |                                          |        |         |          |          |                      |
| <i>t1/t2</i> Arbeitsgedächtnis/<br>Flexibilitätsdefizit | 0.17                          | .04    | .345    | 2.61     | .012     | .12, <i>p</i> = .012 | 0.15                                     | .06    | .334    | 2.51     | .015     | .11, <i>p</i> = .015 |
| Schritt 2                                               |                               |        |         |          |          |                      |                                          |        |         |          |          |                      |
| <i>t1/t2</i> Inhibitionsdefizit                         | 0.04                          | .05    | .123    | 0.88     | .385     | .13, <i>p</i> = .030 | 0.17                                     | .07    | .344    | 2.58     | .013     | .22, <i>p</i> = .002 |
