# Supplementary material for: Eine Längsschnittstudie zur Vorhersage von ADHS-Symptomen und Schulleistungen in der 1. Klasse durch exekutive Funktionen im Vorschulalter
Source: Atypon-hosted journal article supplement (doi:10.1026/0942-5403/a000383), 2022-07-01
Supplement: 0942-5403_a000383_esm4.pdf [file 0942-5403_a000383_esm4.pdf]

**ESM 4.** Tabelle E3. Erklärung von Vorläuferfertigkeiten im letzten Kindergartenjahr durch EF-Defizite zum selben Zeitpunkt.

|                                                            | <i>t1/t2</i> Sprachliche Vorläuferfertigkeiten |           |         |          |          |                      | <i>t1/t2</i> Mathematische Vorläuferfertigkeiten |           |         |          |          |                      |
|------------------------------------------------------------|------------------------------------------------|-----------|---------|----------|----------|----------------------|--------------------------------------------------|-----------|---------|----------|----------|----------------------|
|                                                            | B                                              | SE<br>(B) | $\beta$ | <i>t</i> | <i>p</i> | $\Delta R^2$         | B                                                | SE<br>(B) | $\beta$ | <i>t</i> | <i>p</i> | $\Delta R^2$         |
| <b>Modell 1</b>                                            |                                                |           |         |          |          |                      |                                                  |           |         |          |          |                      |
| <i>t1/t2</i> EF-Defizit                                    | -0.54                                          | .27       | -.268   | -2.02    | .048     | .07, <i>p</i> = .048 | -1.03                                            | .38       | -.346   | -2.68    | .010     | .12, <i>p</i> = .010 |
| <b>Modell 2</b>                                            |                                                |           |         |          |          |                      |                                                  |           |         |          |          |                      |
| Schritt 1                                                  |                                                |           |         |          |          |                      |                                                  |           |         |          |          |                      |
| <i>t1/t2</i> Inhibitionsdefizit                            | -1.02                                          | .48       | -.283   | -0.28    | .038     | .08, <i>p</i> = .038 | -1.81                                            | .69       | -.343   | -2.63    | .011     | .12, <i>p</i> = .011 |
| Schritt 2                                                  |                                                |           |         |          |          |                      |                                                  |           |         |          |          |                      |
| <i>t1/t2</i><br>Arbeitsgedächtnis/<br>Flexibilitätsdefizit | -0.12                                          | .46       | -.036   | -0.25    | .800     | .08, <i>p</i> = .115 | -1.11                                            | .64       | -.235   | -1.75    | .087     | .17, <i>p</i> = .009 |
| <b>Modell 3</b>                                            |                                                |           |         |          |          |                      |                                                  |           |         |          |          |                      |
| Schritt 1                                                  |                                                |           |         |          |          |                      |                                                  |           |         |          |          |                      |
| <i>t1/t2</i> Arbeitsgedächtnis/<br>Flexibilitätsdefizit    | -0.40                                          | .44       | -.122   | -0.89    | .378     | .01, <i>p</i> = .378 | -1.51                                            | .62       | -.321   | -2.44    | .018     | .10, <i>p</i> = .018 |
| Schritt 2                                                  |                                                |           |         |          |          |                      |                                                  |           |         |          |          |                      |
| <i>t1/t2</i> Inhibitionsdefizit                            | -0.98                                          | .51       | -.272   | -1.92    | .061     | .08, <i>p</i> = .115 | -1.41                                            | .71       | -.268   | -1.98    | .052     | .17, <i>p</i> = .009 |
