# Supplementary material for: Eine Längsschnittstudie zur Vorhersage von ADHS-Symptomen und Schulleistungen in der 1. Klasse durch exekutive Funktionen im Vorschulalter
Source: Atypon-hosted journal article supplement (doi:10.1026/0942-5403/a000383), 2022-07-01
Supplement: 0942-5403_a000383_esm5.pdf [file 0942-5403_a000383_esm5.pdf]

**ESM 5.** Tabelle E4. Vorhersage von ADHS-Symptomen in der 1. Klasse durch EF-Defizite im Kindergarten.

|                                                         | <i>t3</i> Unaufmerksamkeit |        |         |          |          |                      | <i>t3</i> Hyperaktivität/Impulsivität |        |         |          |          |                      |
|---------------------------------------------------------|----------------------------|--------|---------|----------|----------|----------------------|---------------------------------------|--------|---------|----------|----------|----------------------|
|                                                         | B                          | SE (B) | $\beta$ | <i>t</i> | <i>p</i> | $\Delta R^2$         | B                                     | SE (B) | $\beta$ | <i>t</i> | <i>p</i> | $\Delta R^2$         |
| <b>Modell 1</b>                                         |                            |        |         |          |          |                      |                                       |        |         |          |          |                      |
| <i>t1/t2</i> EF-Defizit                                 | 0.07                       | .03    | .293    | 2.23     | .030     | .08, <i>p</i> = .030 | 0.14                                  | .04    | .481    | 4.00     | < .001   | .23, <i>p</i> < .001 |
| <b>Modell 2</b>                                         |                            |        |         |          |          |                      |                                       |        |         |          |          |                      |
| Schritt 1                                               |                            |        |         |          |          |                      |                                       |        |         |          |          |                      |
| <i>t1/t2</i> Inhibitionsdefizit                         | 0.17                       | .05    | .390    | 3.05     | .004     | .15, <i>p</i> = .004 | 0.22                                  | .07    | .420    | 3.34     | .002     | .18, <i>p</i> = .002 |
| Schritt 2                                               |                            |        |         |          |          |                      |                                       |        |         |          |          |                      |
| <i>t1/t2</i> Arbeitsgedächtnis/<br>Flexibilitätsdefizit | 0.05                       | .05    | .116    | 0.86     | .394     | .16, <i>p</i> = .010 | 0.10                                  | .06    | .217    | 1.66     | .103     | .22, <i>p</i> = .002 |
| <b>Modell 3</b>                                         |                            |        |         |          |          |                      |                                       |        |         |          |          |                      |
| Schritt 1                                               |                            |        |         |          |          |                      |                                       |        |         |          |          |                      |
| <i>t1/t2</i> Arbeitsgedächtnis/<br>Flexibilitätsdefizit | 0.09                       | .05    | .229    | 1.69     | .097     | .05, <i>p</i> = .097 | 0.15                                  | .06    | .328    | 2.51     | .015     | .11, <i>p</i> = .015 |
| Schritt 2                                               |                            |        |         |          |          |                      |                                       |        |         |          |          |                      |
| <i>t1/t2</i> Inhibitionsdefizit                         | 0.15                       | .06    | .353    | 2.61     | .012     | .16, <i>p</i> = .010 | 0.18                                  | .07    | .351    | 2.69     | .010     | .22, <i>p</i> = .002 |
