# Supplementary material for: Eine Längsschnittstudie zur Vorhersage von ADHS-Symptomen und Schulleistungen in der 1. Klasse durch exekutive Funktionen im Vorschulalter
Source: Atypon-hosted journal article supplement (doi:10.1026/0942-5403/a000383), 2022-07-01
Supplement: 0942-5403_a000383_esm6.pdf [file 0942-5403_a000383_esm6.pdf]

**ESM 6.** Tabelle E5. Vorhersage von Schulleistungen in der 1. Klasse durch EF-Defizite im Kindergarten.

|                                                         | <i>t3</i> Schriftsprachliche Schulleistungen |           |         |          |          |                      | <i>t3</i> Mathematische Schulleistungen |           |         |          |          |                      |
|---------------------------------------------------------|----------------------------------------------|-----------|---------|----------|----------|----------------------|-----------------------------------------|-----------|---------|----------|----------|----------------------|
|                                                         | B                                            | SE<br>(B) | $\beta$ | <i>t</i> | <i>p</i> | $\Delta R^2$         | B                                       | SE<br>(B) | $\beta$ | <i>t</i> | <i>p</i> | $\Delta R^2$         |
| <b>Modell 1</b>                                         |                                              |           |         |          |          |                      |                                         |           |         |          |          |                      |
| <i>t1/t2</i> EF-Defizit                                 | -0.04                                        | .06       | -.078   | -0.57    | .572     | .01, <i>p</i> = .572 | -0.08                                   | .21       | -.056   | -0.40    | .687     | .00, <i>p</i> = .687 |
| <b>Modell 2</b>                                         |                                              |           |         |          |          |                      |                                         |           |         |          |          |                      |
| Schritt 1                                               |                                              |           |         |          |          |                      |                                         |           |         |          |          |                      |
| <i>t1/t2</i> Inhibitionsdefizit                         | -0.07                                        | .11       | -.091   | -0.66    | .515     | .01, <i>p</i> = .515 | -0.08                                   | .37       | -.031   | -0.22    | .822     | .00, <i>p</i> = .822 |
| Schritt 2                                               |                                              |           |         |          |          |                      |                                         |           |         |          |          |                      |
| <i>t1/t2</i> Arbeitsgedächtnis/<br>Flexibilitätsdefizit | -0.09                                        | .11       | -.130   | -0.89    | .337     | .02, <i>p</i> = .547 | -0.33                                   | .35       | -.140   | -0.95    | .344     | .02, <i>p</i> = .621 |
| <b>Modell 3</b>                                         |                                              |           |         |          |          |                      |                                         |           |         |          |          |                      |
| Schritt 1                                               |                                              |           |         |          |          |                      |                                         |           |         |          |          |                      |
| <i>t1/t2</i> Arbeitsgedächtnis/<br>Flexibilitätsdefizit | -0.11                                        | .10       | -.146   | -1.06    | .293     | .02, <i>p</i> = .293 | -0.32                                   | .33       | -.136   | -0.99    | .328     | .02, <i>p</i> = .328 |
| Schritt 2                                               |                                              |           |         |          |          |                      |                                         |           |         |          |          |                      |
| <i>t1/t2</i> Inhibitionsdefizit                         | -0.04                                        | .12       | -.049   | -0.34    | .738     | .02, <i>p</i> = .547 | -0.03                                   | .39       | -.013   | -0.89    | .929     | .02, <i>p</i> = .621 |
